# Supplementary material for: Erwinia teleogrylli sp. nov., a Bacterial Isolate Associated with a Chinese Cricket
Source: PubMed Central journal article supplement (PMC4723187; doi:10.1371/journal.pone.0146596), 2016-01-22
Supplement: pone.0146596.s001.pdf [file pone.0146596.s001.pdf]

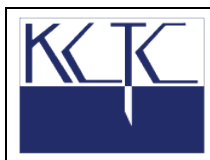

Korean Collection for Type Cultures (KCTC), Microbial Resource Center

Korea Research Institute of Bioscience and Biotechnology (KRIBB)

125 Gwahak-ro, Yuseong-gu, Daejeon, 305-806, Korea

Tel: +82-42-860-4629, FAX: +82-42-860-4625

---

## Certificate of Deposit

Date: February 11, 2014

The following information is confidential and acts only to confirm that a strain has been deposited to the KCTC.

**Dickeya sp. SCU-B244** has been deposited in the general collection of microorganisms in the KCTC under the number **KCTC 42022**.

This strain is now readily available to the international scientific research community. Access to the strain is not restricted and it shall be supplied to anyone upon request.

*Song-Gun Kim*

Song-Gun Kim, Ph.D.

Curator responsible for the strain

Korean Collection for Type Cultures (KCTC)

Microbial Resource Center (BRC)

Korea Research Institute of Bioscience and Biotechnology (KRIBB)

125 Gwahak-ro, Yuseong-gu, Daejeon, 305-806, Korea
